# Supplementary material for: Molecular response to PARP1 inhibition in ovarian cancer cells as determined by mass spectrometry based proteomics
Source: PubMed Central journal article supplement (PMC8539835; doi:10.1186/s13048-021-00886-x), 2021-10-22

**a**

## Comparison protein module activity - Olaparib

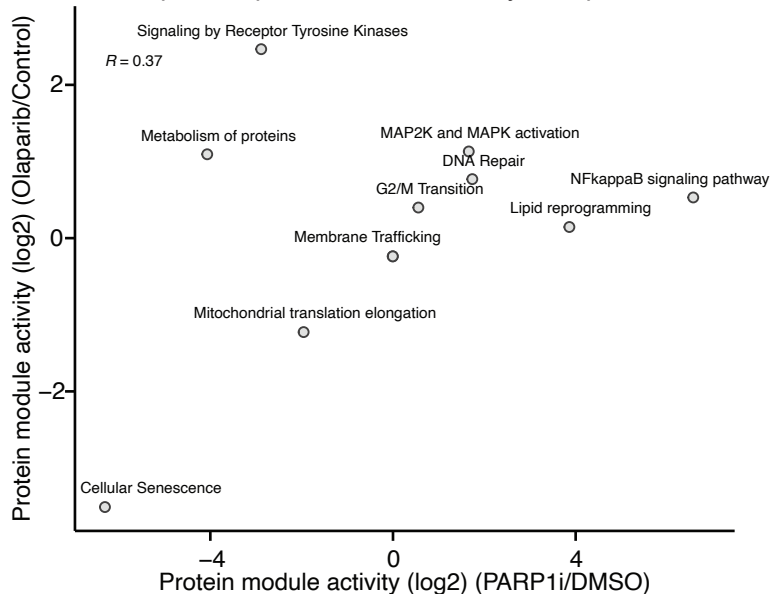**b**

## Comparison protein module activity - Rucaparib

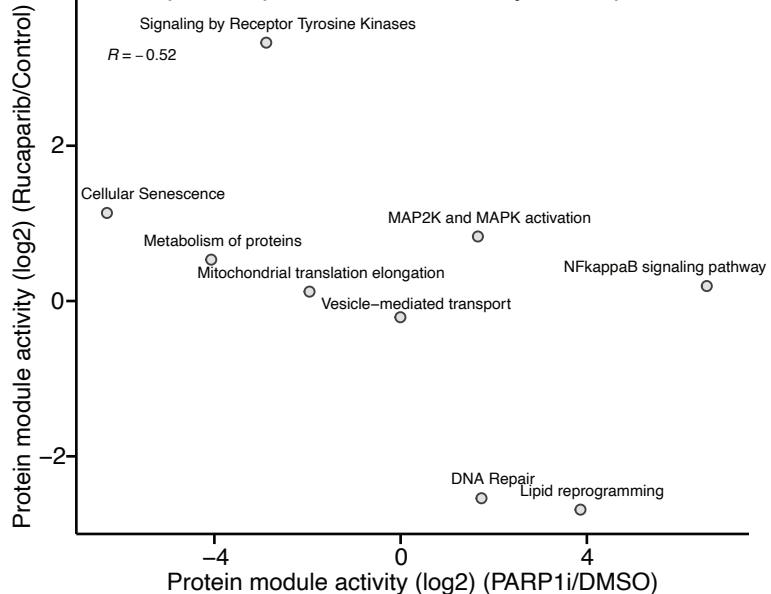

Supplement: 13048_2021_886_MOESM2_ESM.pdf [file 13048_2021_886_MOESM2_ESM.pdf]
